# Supplementary material
Source: PubMed Central journal article supplement (PMC7254443)

## Supplementary Online Content

Jung JM, Lee KH, Kim Y-J, et al. Assessment of overall and specific cancer risks in patients with hidradenitis suppurativa. *JAMA Dermatol*. Published online May 27, 2020. doi:10.1001/jamadermatol.2020.1422

**eTable 1.** *International Statistical Classification of Disease, 10th Revision* Codes for Specific Cancers

**eTable 2.** Risks of Overall and Specific Cancers in Patients With Hidradenitis Suppurativa Compared With a Matched Comparator Cohort

**eFigure.** Flow Chart of the Study

This supplementary material has been provided by the authors to give readers additional information about their work.

**eTable 1. *International Statistical Classification of Disease, 10th Revision* codes for specific cancers**

| <b>Cancer</b>                           | <b>Code</b> |
|-----------------------------------------|-------------|
| Leukemia                                | C91–95      |
| Lymphoma                                | C81–86      |
| Hodgkin lymphoma                        | C81         |
| Non-Hodgkin lymphoma                    | C82–86      |
| Multiple myeloma                        | C90         |
| Malignant melanoma of skin              | C43         |
| Non melanoma skin cancer                | C44         |
| Bone and articular cartilage cancer     | C40–41      |
| Kaposi's sarcoma                        | C46         |
| Thyroid cancer                          | C73         |
| Adrenal cancer                          | C74         |
| Oral cavity and pharyngeal cancer       | C01–14      |
| Laryngeal cancer                        | C32         |
| Esophageal cancer                       | C15         |
| Gastric cancer                          | C16         |
| Small intestine cancer                  | C17         |
| Colorectal cancer                       | C18–21      |
| Liver cancer                            | C22         |
| Pancreatic cancer                       | C25         |
| Biliary cancer                          | C23, C24    |
| Lung cancer                             | C33, C34    |
| Renal cancer                            | C64         |
| Bladder cancer                          | C67         |
| Cancer of central nervous system cancer | C70–72      |
| Breast cancer                           | C50         |
| Uterine cervical cancer                 | C53         |
| Uterine corpus cancer                   | C54, C55    |
| Ovarian cancer                          | C56         |
| Prostate cancer                         | C61         |
| Testicular cancer                       | C62         |

**eTable 2. Risks of overall and specific cancers in patients with hidradenitis suppurativa compared with a matched comparator cohort**

| Cancer subtype                    | Matched comparator cohort (1:8)<br>(n = 179,734) |              |                                                    | Patients with hidradenitis suppurativa (n = 22,468) |              |                                                    | Multivariable analysis            |                     |
|-----------------------------------|--------------------------------------------------|--------------|----------------------------------------------------|-----------------------------------------------------|--------------|----------------------------------------------------|-----------------------------------|---------------------|
|                                   | Event, n                                         | person-years | Incidence rate (per 100,000 person-years) (95% CI) | Event, n                                            | person-years | Incidence rate (per 100,000 person-years) (95% CI) | Adjusted HR <sup>a</sup> (95% CI) | P value             |
| Overall cancer                    | 2,477                                            | 853330.14    | 290.27 (278.95–301.94)                             | 379                                                 | 105992.03    | 357.57 (322.48–395.45)                             | 1.28 (1.15–1.42)                  | < .001 <sup>b</sup> |
| Oral cavity and pharyngeal cancer | 33                                               | 853330.14    | 3.87 (2.66–5.43)                                   | 12                                                  | 105992.03    | 11.32 (5.85–19.78)                                 | 3.10 (1.60–6.02)                  | .001 <sup>b</sup>   |
| Esophageal cancer                 | 17                                               | 853330.14    | 1.99 (1.16–3.19)                                   | 3                                                   | 105992.03    | 2.83 (0.58–8.27)                                   | 1.51 (0.44–5.18)                  | .510                |
| Gastric cancer                    | 377                                              | 853330.14    | 44.18 (39.83–48.87)                                | 45                                                  | 105992.03    | 42.46 (30.97–56.81)                                | 1.02 (0.75–1.39)                  | .903                |
| Small intestine cancer            | 9                                                | 853330.14    | 1.05 (0.48–2.00)                                   | 2                                                   | 105992.03    | 1.89 (0.23–6.82)                                   | 1.80 (0.39–8.37)                  | .453                |
| Colorectal cancer                 | 321                                              | 853330.14    | 37.62 (33.61–41.97)                                | 55                                                  | 105992.03    | 51.89 (39.09–67.54)                                | 1.45 (1.09–1.93)                  | .012 <sup>b</sup>   |
| Liver cancer                      | 188                                              | 853330.14    | 22.03 (18.99–25.42)                                | 24                                                  | 105992.03    | 22.64 (14.51–33.69)                                | 1.10 (0.72–1.68)                  | .668                |
| Biliary cancer                    | 59                                               | 853330.14    | 6.91 (5.26–8.92)                                   | 9                                                   | 105992.03    | 8.49 (3.88–16.12)                                  | 1.30 (0.64–2.62)                  | .473                |
| Pancreatic cancer                 | 65                                               | 853330.14    | 7.62 (5.88–9.71)                                   | 9                                                   | 105992.03    | 8.49 (3.88–16.12)                                  | 1.15 (0.57–2.32)                  | .688                |
| Laryngeal cancer                  | 15                                               | 853330.14    | 1.76 (0.98–2.90)                                   | 1                                                   | 105992.03    | 0.94 (0.02–5.26)                                   | 0.59 (0.08–4.49)                  | .611                |
| Lung cancer                       | 251                                              | 853330.14    | 29.41 (25.89–33.29)                                | 37                                                  | 105992.03    | 34.91 (24.58–48.12)                                | 1.25 (0.89–1.77)                  | .201                |

| Cancer subtype                      | Matched comparator cohort (1:8)<br>(n = 179,734) |              |                                                    | Patients with hidradenitis suppurativa (n = 22,468) |              |                                                    | Multivariable analysis            |                   |
|-------------------------------------|--------------------------------------------------|--------------|----------------------------------------------------|-----------------------------------------------------|--------------|----------------------------------------------------|-----------------------------------|-------------------|
|                                     | Event, n                                         | person-years | Incidence rate (per 100,000 person-years) (95% CI) | Event, n                                            | person-years | Incidence rate (per 100,000 person-years) (95% CI) | Adjusted HR <sup>a</sup> (95% CI) | P value           |
| Bone and articular cartilage cancer | 10                                               | 853330.14    | 1.17 (0.56–2.16)                                   | 1                                                   | 105992.03    | 0.94 (0.02–5.26)                                   | 0.74 (0.10–5.83)                  | .778              |
| Malignant melanoma of skin          | 6                                                | 853330.14    | 0.70 (0.26–1.53)                                   | 1                                                   | 105992.03    | 0.94 (0.02–5.26)                                   | 1.44 (0.17–12.08)                 | .738              |
| Non-melanoma skin cancer            | 52                                               | 853330.14    | 6.09 (4.55–7.99)                                   | 13                                                  | 105992.03    | 12.27 (6.53–20.97)                                 | 2.06 (1.12–3.79)                  | .020 <sup>b</sup> |
| Kaposi's sarcoma                    | 0                                                | 853330.14    | 0.00                                               | 0                                                   | 105992.03    | 0.00                                               |                                   |                   |
| Breast cancer                       | 181                                              | 328844.11    | 55.04 (47.31–63.67)                                | 27                                                  | 40851.81     | 66.09 (43.56–96.16)                                | 1.22 (0.81–1.82)                  | .344              |
| Uterine cervical cancer             | 42                                               | 328844.11    | 12.77 (9.20–17.26)                                 | 2                                                   | 40851.81     | 4.90 (0.59–17.69)                                  | 0.38 (0.09–1.58)                  | .184              |
| Uterine corpus cancer               | 19                                               | 328844.11    | 5.78 (3.48–9.02)                                   | 2                                                   | 40851.81     | 4.90 (0.59–17.69)                                  | 0.85 (0.20–3.66)                  | .829              |
| Ovarian cancer                      | 24                                               | 328844.11    | 7.30 (4.68–10.86)                                  | 3                                                   | 40851.81     | 7.34 (1.51–21.46)                                  | 1.07 (0.32–3.55)                  | .914              |
| Prostate cancer                     | 97                                               | 524486.02    | 18.49 (15.00–22.56)                                | 23                                                  | 65140.22     | 35.31 (22.38–52.98)                                | 2.05 (1.30–3.24)                  | .002 <sup>b</sup> |
| Testicular cancer                   | 8                                                | 524486.02    | 1.53 (0.66–3.01)                                   | 1                                                   | 65140.22     | 1.54 (0.04–8.55)                                   | 1.03 (0.13–8.20)                  | .981              |
| Renal cancer                        | 58                                               | 853330.14    | 6.80 (5.16–8.79)                                   | 10                                                  | 105992.03    | 9.43 (4.52–17.35)                                  | 1.40 (0.71–2.74)                  | .332              |
| Bladder cancer                      | 59                                               | 853330.14    | 6.91 (5.26–8.92)                                   | 4                                                   | 105992.03    | 3.77 (1.03–9.66)                                   | 0.57 (0.21–1.36)                  | .275              |

| Cancer subtype                          | Matched comparator cohort (1:8)<br>(n = 179,734) |              |                                                    | Patients with hidradenitis suppurativa (n = 22,468) |              |                                                    | Multivariable analysis            |                   |
|-----------------------------------------|--------------------------------------------------|--------------|----------------------------------------------------|-----------------------------------------------------|--------------|----------------------------------------------------|-----------------------------------|-------------------|
|                                         | Event, n                                         | person-years | Incidence rate (per 100,000 person-years) (95% CI) | Event, n                                            | person-years | Incidence rate (per 100,000 person-years) (95% CI) | Adjusted HR <sup>a</sup> (95% CI) | P value           |
| Cancer of central nervous system cancer | 38                                               | 853330.14    | 4.45 (3.15–6.11)                                   | 11                                                  | 105992.03    | 10.38 (5.18–18.57)                                 | 2.40 (1.22–4.70)                  | .011 <sup>b</sup> |
| Thyroid cancer                          | 373                                              | 853330.14    | 43.71 (39.39–48.38)                                | 55                                                  | 105992.03    | 51.89 (39.09–67.54)                                | 1.18 (0.89–1.57)                  | .244              |
| Adrenal cancer                          | 4                                                | 853330.14    | 0.47 (0.13–1.20)                                   | 1                                                   | 105992.03    | 0.94 (0.02–5.26)                                   | 2.08 (0.23–18.91)                 | .516              |
| Lymphoma                                | 52                                               | 853330.14    | 6.09 (4.55–7.99)                                   | 11                                                  | 105992.03    | 10.38 (5.18–18.57)                                 | 1.68 (0.87–3.22)                  | .121              |
| Hodgkin lymphoma                        | 5                                                | 853330.14    | 0.59 (0.19–1.37)                                   | 3                                                   | 105992.03    | 2.83 (0.58–8.27)                                   | 5.08 (1.21–21.36)                 | .027 <sup>b</sup> |
| Non–Hodgkin lymphoma                    | 47                                               | 853330.14    | 5.51 (4.05–7.32)                                   | 8                                                   | 105992.03    | 7.55 (3.26–14.87)                                  | 1.34 (0.63–2.83)                  | .451              |
| Multiple myeloma                        | 10                                               | 853330.14    | 1.17 (0.56–2.16)                                   | 2                                                   | 105992.03    | 1.89 (0.23–6.82)                                   | 1.65 (0.36–7.60)                  | .518              |
| Leukemia                                | 39                                               | 853330.14    | 4.57 (3.25–6.25)                                   | 7                                                   | 105992.03    | 6.60 (2.66–13.61)                                  | 1.52 (0.68–3.39)                  | .312              |

Abbreviations: CI, confidence interval; HR, hazard ratio

<sup>a</sup>Adjusted by the presence of hypertension and dyslipidemia

<sup>b</sup>Statistically significant

**eFigure 1. Flow chart of the study**

HS, hidradenitis suppurativa

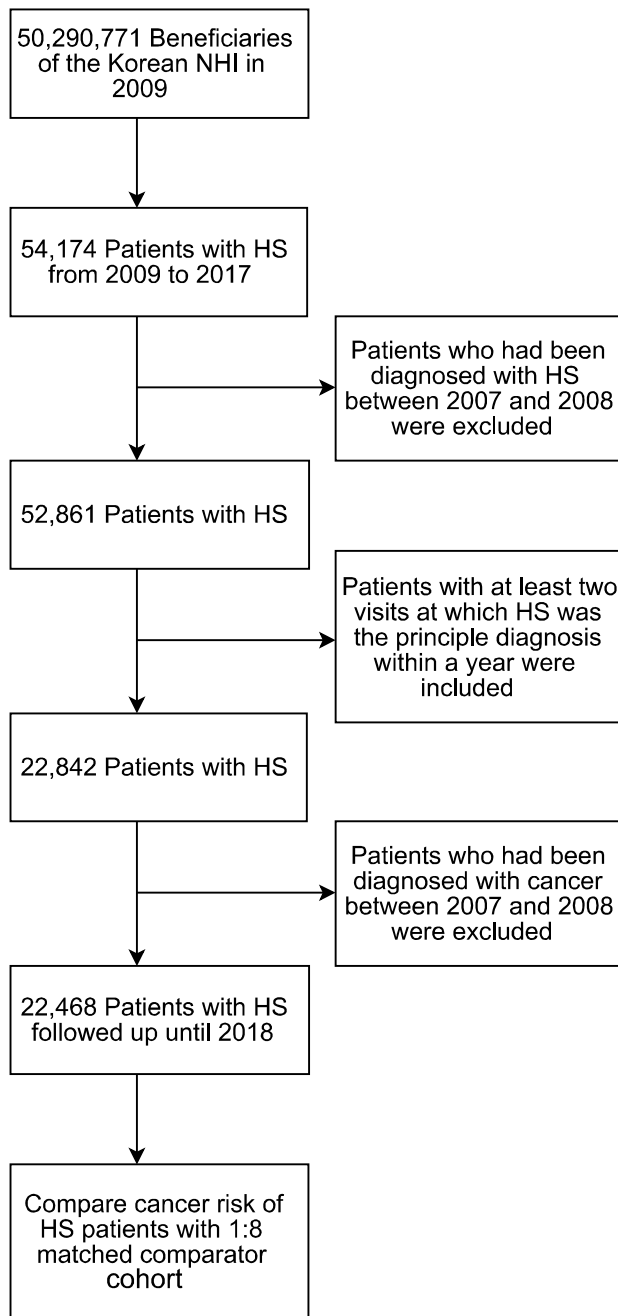

Supplement: jamadermatol-156-844-s001.pdf [file jamadermatol-156-844-s001.pdf]
